# Supplementary material for: Biologically Active Compounds in Stizolophus balsamita Inflorescences: Isolation, Phytochemical Characterization and Effects on the Skin Biophysical Parameters
Source: MDPI journal article supplement (doi:10.3390/ijms22094428), 2021-04-23
Supplement: s1 [file s1]

## Biologically active compounds in *Stizolophus balsamita* inflorescences: isolation, phytochemical characterization and effects on the skin biophysical parameters

Joanna Nawrot<sup>1</sup>, Jaromir Budzianowski<sup>2</sup>, Gerard Nowak<sup>1</sup>, Iwona Micek<sup>1</sup>, Anna Budzianowska<sup>2</sup> and Justyna Gornowicz-Porowska<sup>1\*</sup>

- <sup>1</sup> Department and Division of Practical Cosmetology and Skin Diseases Prophylaxis, Poznan University of Medicinal Sciences, Mazowiecka 33, 60-623 Poznan, Poland  
<sup>2</sup> Department of Pharmaceutical Botany and Plant Biotechnology, Poznan University of Medical Sciences, SwMariiMagdaleny Str., 60-356 Poznan, Poland

### Supplementary material

#### List of supporting information

Compound **1** (izospiciformin).

Compound **2**(stizolin).

Compound **3**(stizolicin).

Compound **4**(quercetin).

Compound **5** (kaempferol).

Compound **6** (rhamnetin).

Compound **7**(taxifolin).

Compound **8** (kaempferol 3-*O*- $\alpha$ -rhamnoside).

Compound **9**(ajugasterone C).

Compound **10**(arbutin).

Compound **11** (protocatechuic acid methyl ester).

#### List of spectra:

Figure S1. <sup>1</sup>H NMR spectrum (600 MHz, CD<sub>3</sub>OD) of compound **4**.

Figure S2. <sup>1</sup>H NMR spectrum (600 MHz, CD<sub>3</sub>OD) of compound **5**.

Figure S3. EI-MS spectrum of compound **6**.

Figure S4. <sup>1</sup>H NMR spectrum (600 MHz, CD<sub>3</sub>OD) of compound **7**.

Figure S5. <sup>13</sup>C NMR spectrum (150 MHz, CD<sub>3</sub>OD) of compound **7**.

Figure S6. HH-COSY spectrum (600 MHz, CD<sub>3</sub>OD) of compound **7**.

Figure S7. HSQC spectrum (600/150 MHz, CD<sub>3</sub>OD) of compound **7**.

Figure S8. HMBC spectrum (600/150 MHz, CD<sub>3</sub>OD) of compound **7**.

Figure S9. NOESY spectrum (600 MHz, CD<sub>3</sub>OD) of compound **7**.

Figure S10. <sup>1</sup>H NMR spectrum (600 MHz, CD<sub>3</sub>OD) of a mixture of compounds **8** and **9**. Only signals of compound **8** are labeled.

Figure S11. <sup>13</sup>C NMR spectrum (150 MHz, CD<sub>3</sub>OD) of a mixture of compounds **8** and **9**.

Figure S12.  $^{13}\text{C}$  NMR spectrum (150 MHz,  $\text{CD}_3\text{OD}$ ) of a mixture of compounds **8** and **9**. Only signals of compound **8** are labeled.

Figure S13. HH-COSY spectrum (600 MHz,  $\text{CD}_3\text{OD}$ ) of a mixture of compounds **8** and **9**. Only signals of compound **8** are labeled.

Figure S14. HSQC spectrum (600/150 MHz,  $\text{CD}_3\text{OD}$ ) of a mixture of compounds **8** and **9**. Only signals of compound **8** are labeled.

Figure S15. HMBC spectrum (600/150 MHz,  $\text{CD}_3\text{OD}$ ) of a mixture of compounds **8** and **9**. Only signals of compound **8** are labeled.

Figure S16. NOESY spectrum (600 MHz,  $\text{CD}_3\text{OD}$ ) of a mixture of compounds **8** and **9**.

Figure S17.  $^1\text{H}$  NMR spectrum (600 MHz,  $\text{CD}_3\text{OD}$ ) of a mixture of compounds **7**, **10** and **11**.

Figure S18.  $^1\text{H}$  NMR spectrum (600 MHz,  $\text{CD}_3\text{OD}$ ) of a mixture of compounds **7**, **10** and **11**. Only signals of compound **11** are labeled.

Figure S19.  $^1\text{H}$  NMR spectrum (600 MHz,  $\text{CD}_3\text{OD}$ ) of a mixture of compounds **7**, **10** and **11**. Only signals of compound **10** are labeled.

Figure S20.  $^1\text{H}$  NMR spectrum (600 MHz,  $\text{CD}_3\text{OD}$ ) of a mixture of compounds **7**, **10** and **11**. Only signals of compound **7** are labeled.

Figure S21.  $^{13}\text{C}$  NMR spectrum (150 MHz,  $\text{CD}_3\text{OD}$ ) of a mixture of compounds **7**, **10** and **11**.

Figure S22. HH-COSY spectrum (600 MHz,  $\text{CD}_3\text{OD}$ ) of a mixture of compounds **7**, **10** and **11**.

Figure S23. HSQC spectrum (600/150 MHz,  $\text{CD}_3\text{OD}$ ) of a mixture of compounds **7**, **10** and **11**.

Figure S24. HMBC spectrum (600/150 MHz,  $\text{CD}_3\text{OD}$ ) of a mixture of compounds **7**, **10** and **11**. The signals of compound **7** are labeled.

Figure S25.  $^1\text{H}$  NMR spectrum (600 MHz,  $\text{CD}_3\text{OD}$ ) of arbutin from *Serratulaquinquefolia*.

Figure S26.  $^{13}\text{C}$  NMR spectrum (150 MHz,  $\text{CD}_3\text{OD}$ ) of arbutin from *Serratulaquinquefolia*.

Figure S27. HH-COSY spectrum (600 MHz,  $\text{CD}_3\text{OD}$ ) of arbutin from *Serratulaquinquefolia*.

Figure S28. HSQC spectrum (600/150 MHz,  $\text{CD}_3\text{OD}$ ) of arbutin from *Serratulaquinquefolia*.

List of tables:

Table S1.

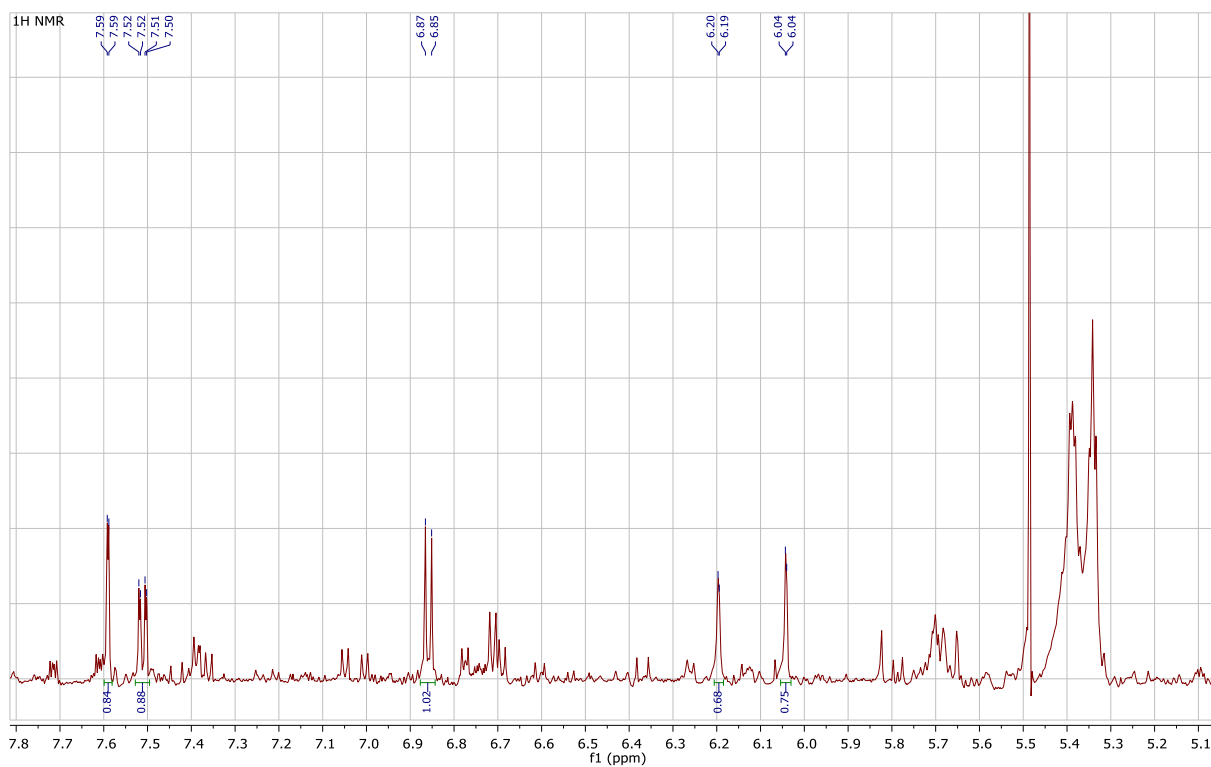

Figure S1. <sup>1</sup>H NMR spectrum (600 MHz, CD<sub>3</sub>OD) of compound **4**.

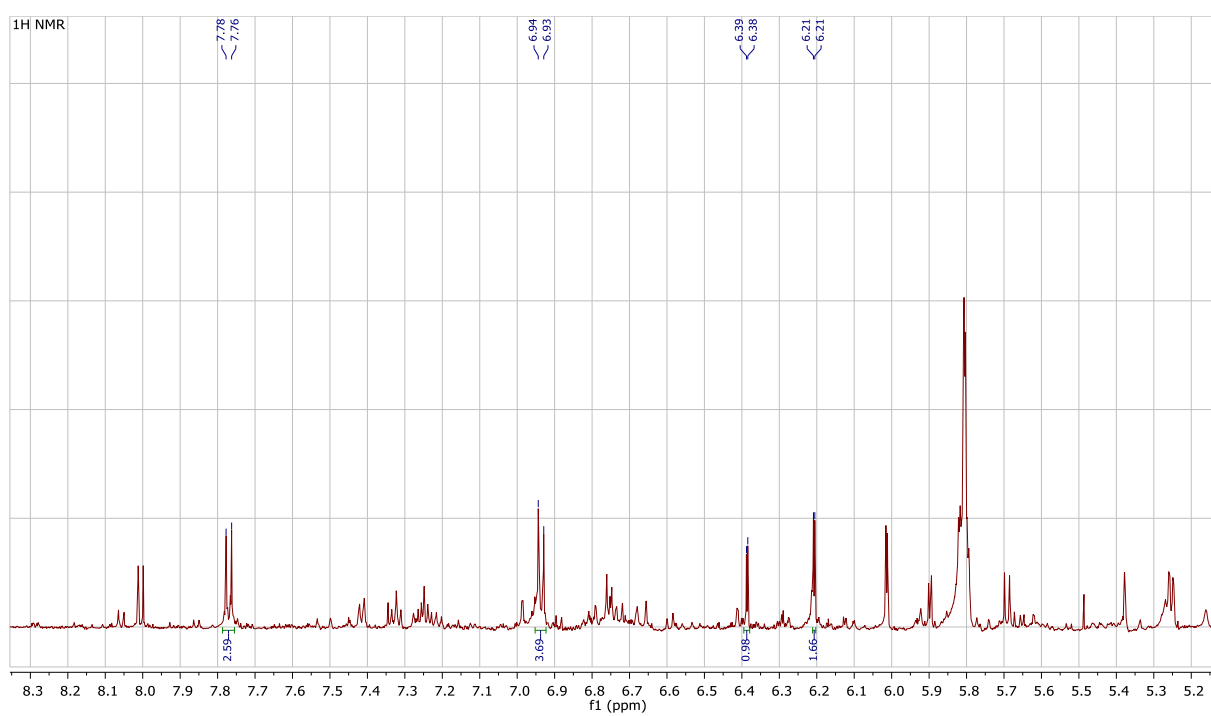

Figure S2. <sup>1</sup>H NMR spectrum (600 MHz, CD<sub>3</sub>OD) of compound **5**.

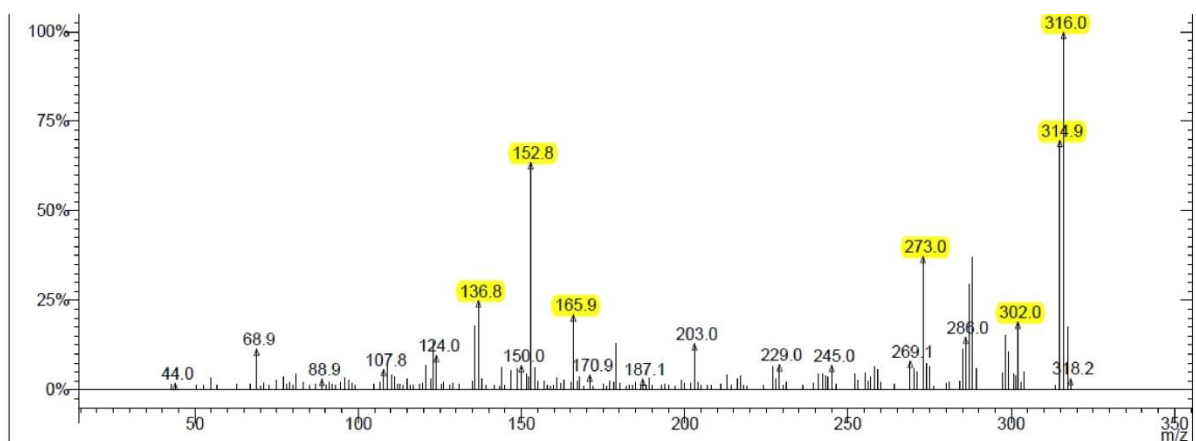

Figure S3. EI-MS spectrum of compound 6.

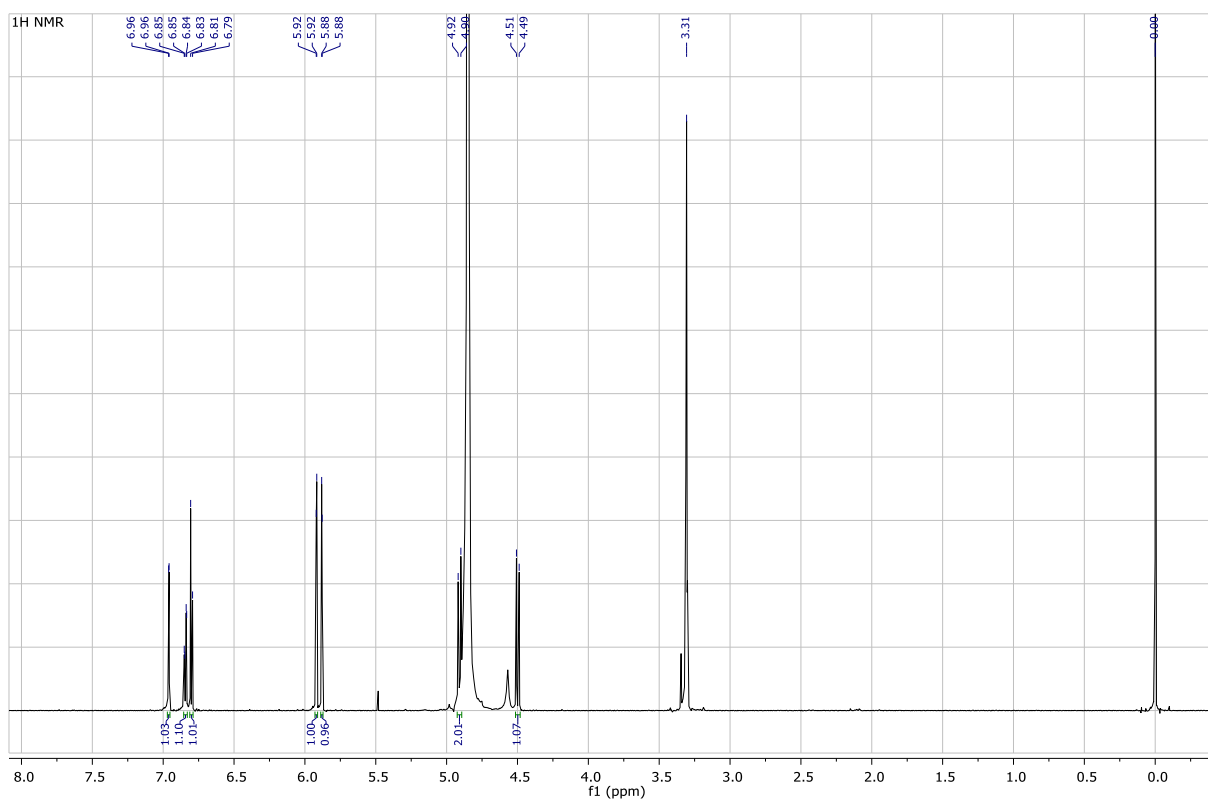

Figure S4.  $^1\text{H}$  NMR spectrum (600 MHz,  $\text{CD}_3\text{OD}$ ) of compound 7.

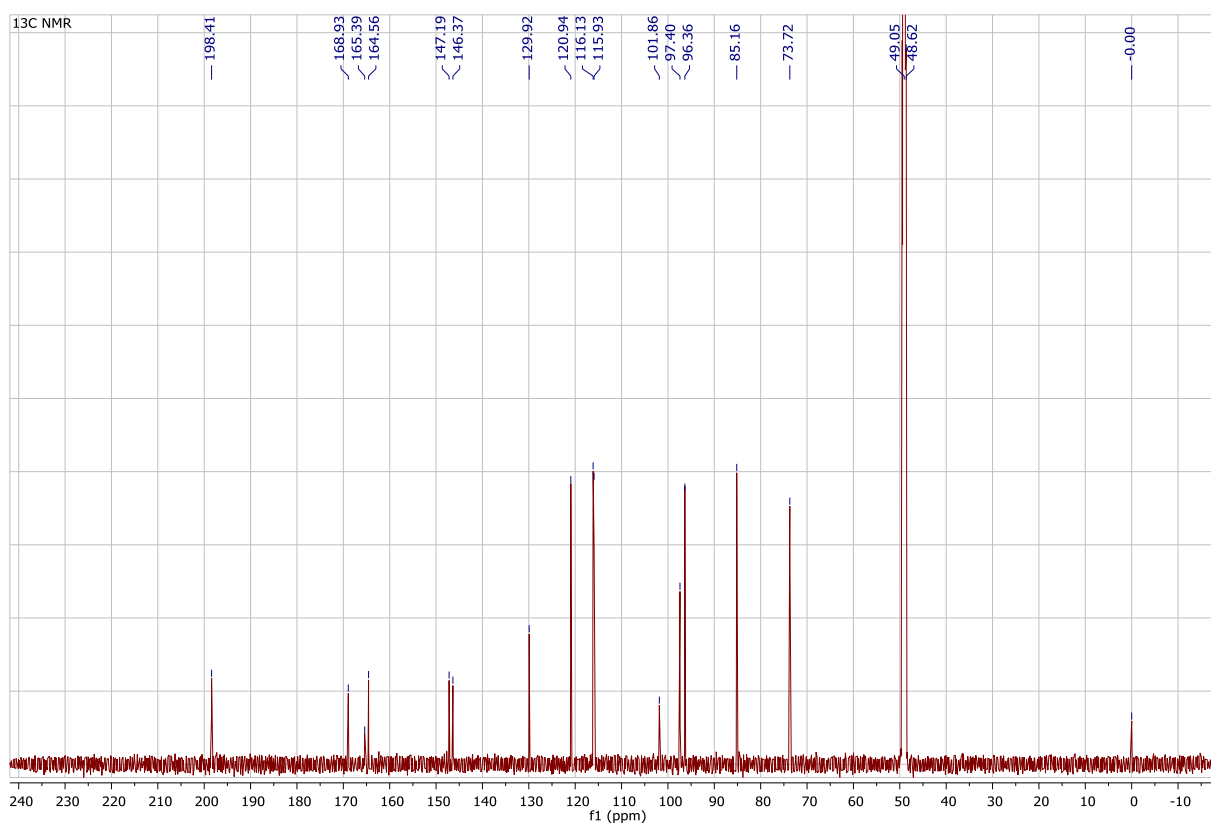

Figure S5. <sup>13</sup>C NMR spectrum (150 MHz, CD<sub>3</sub>OD) of compound **7**.

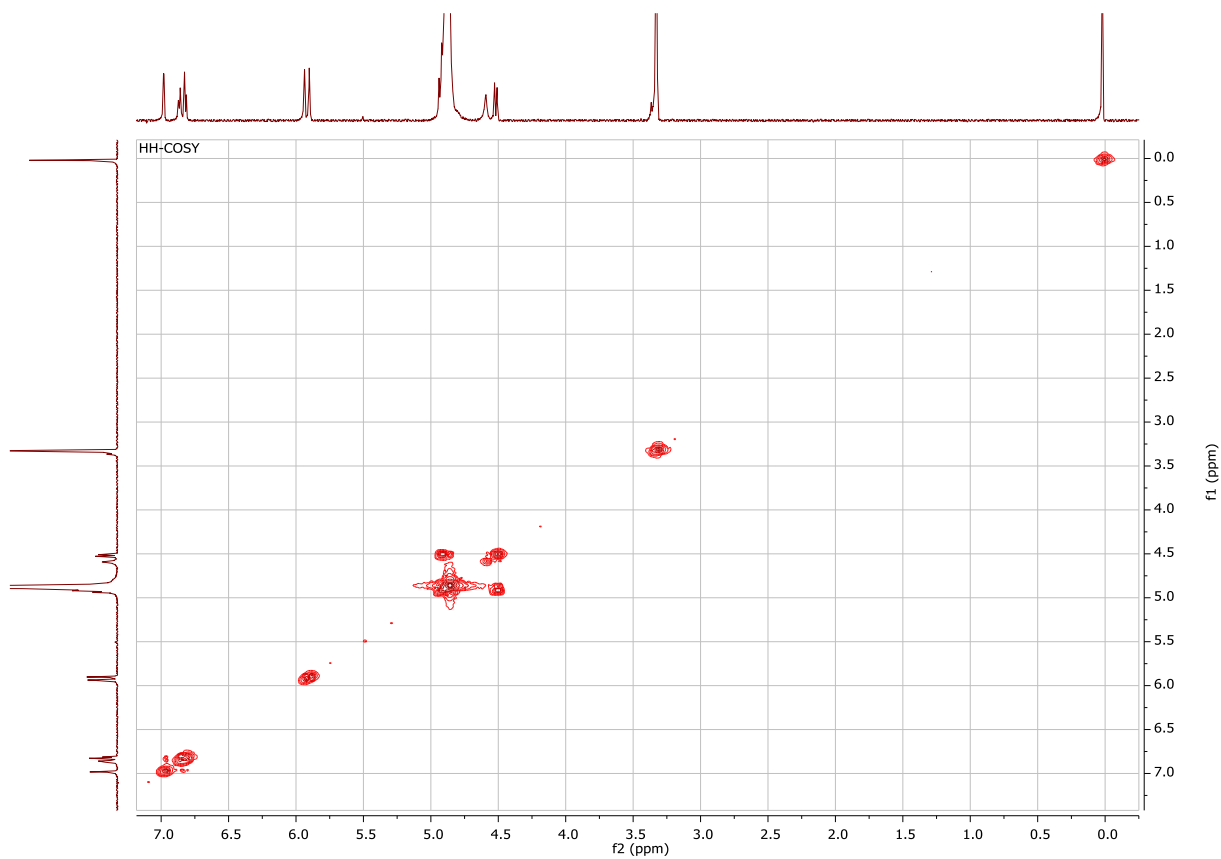

Figure S6. HH-COSY spectrum (600 MHz, CD<sub>3</sub>OD) of compound **7**.

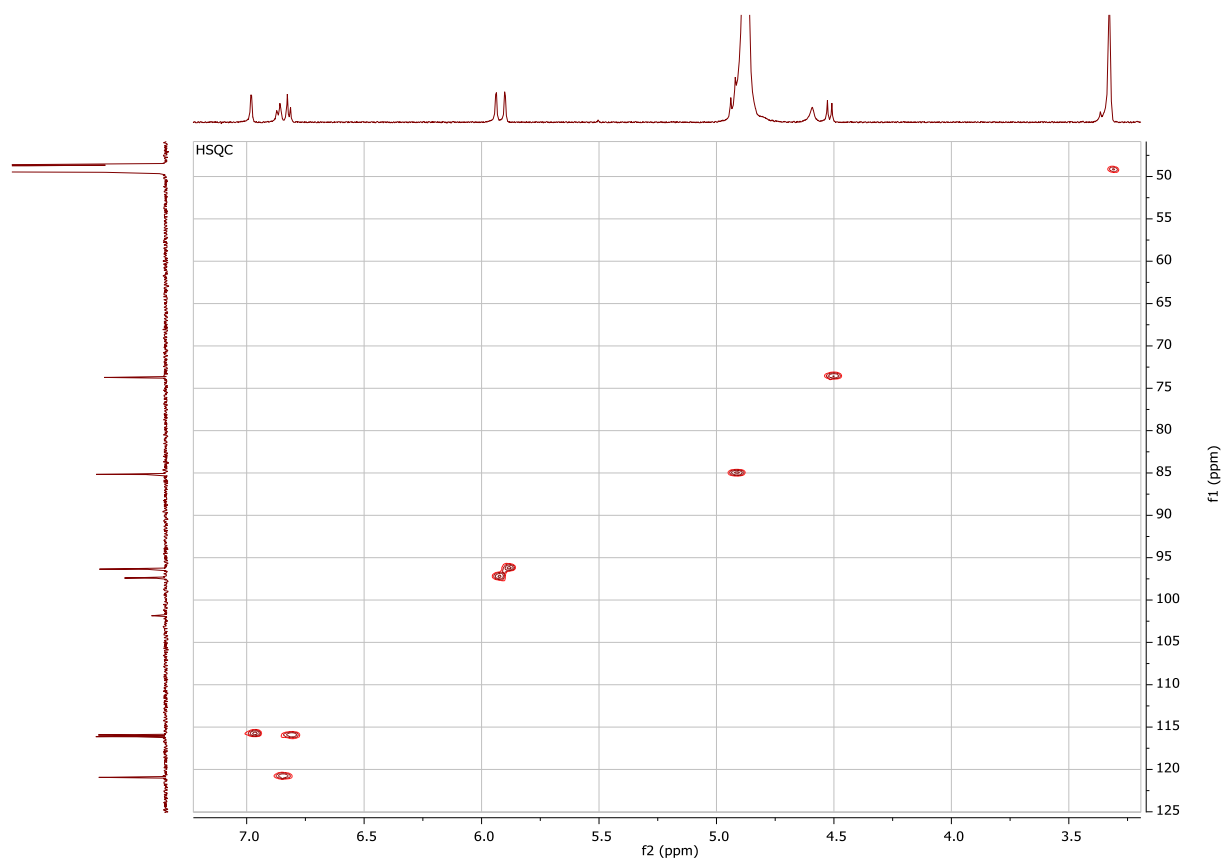

Figure S7. HSQC spectrum (600/150 MHz, CD<sub>3</sub>OD) of compound **7**.

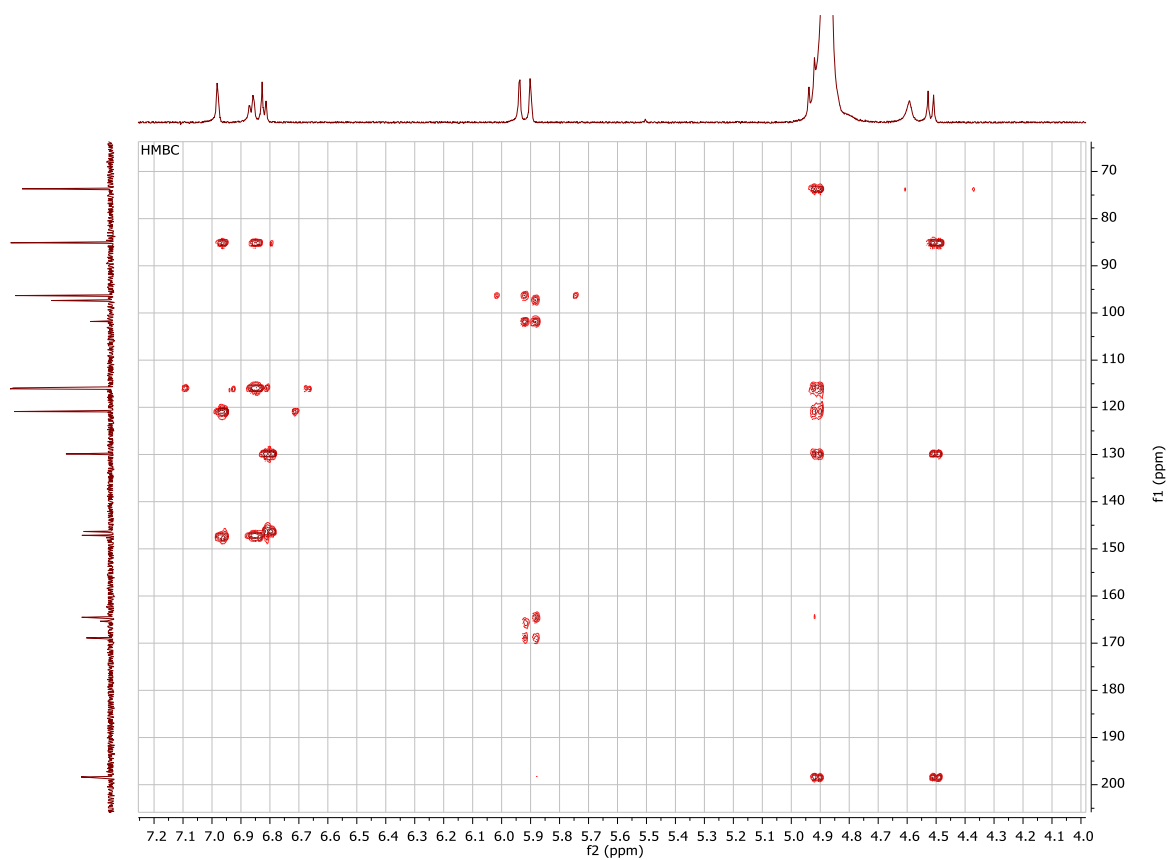

Figure S8. HMBC spectrum (600/150 MHz, CD<sub>3</sub>OD) of compound **7**.

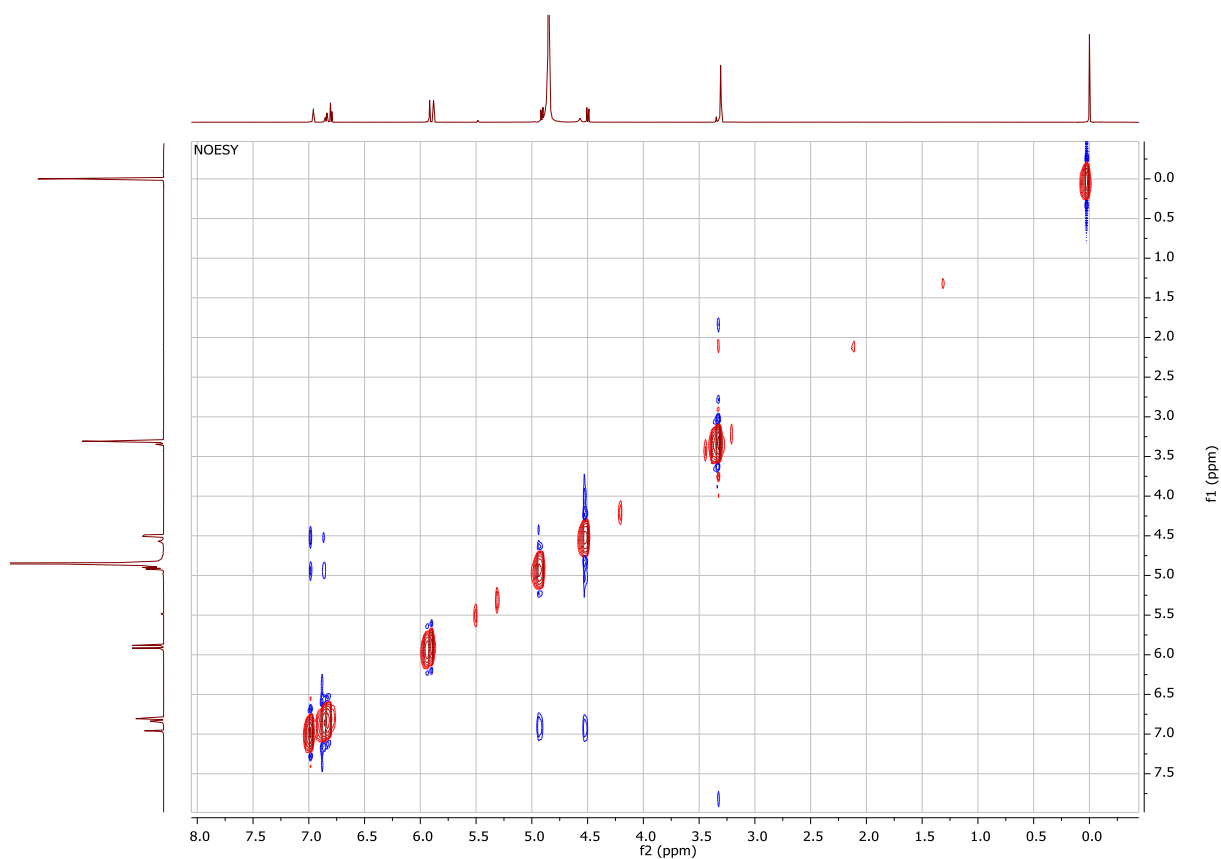

Figure S9. NOESY spectrum (600 MHz, CD<sub>3</sub>OD) of compound **7**.

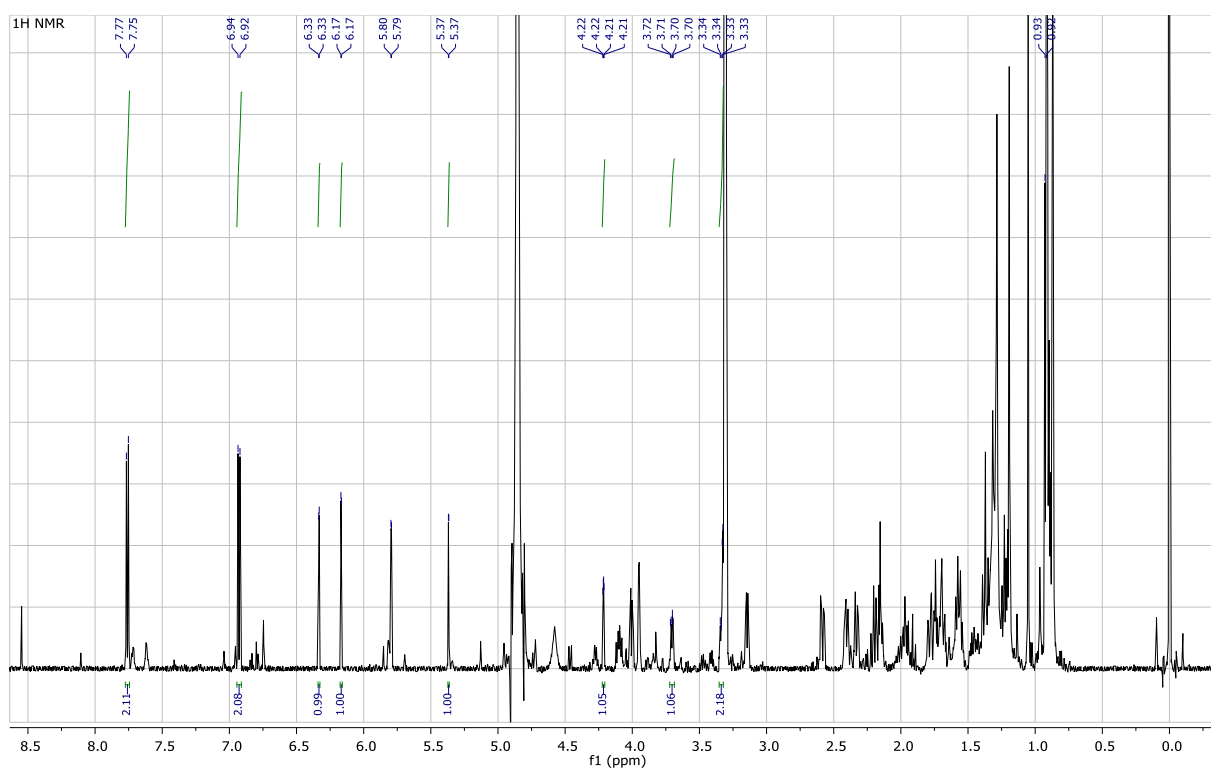

Figure S10. <sup>1</sup>H NMR spectrum (600 MHz, CD<sub>3</sub>OD) of a mixture of compounds **8** and **9**. Only signals of compound **8** are labeled.

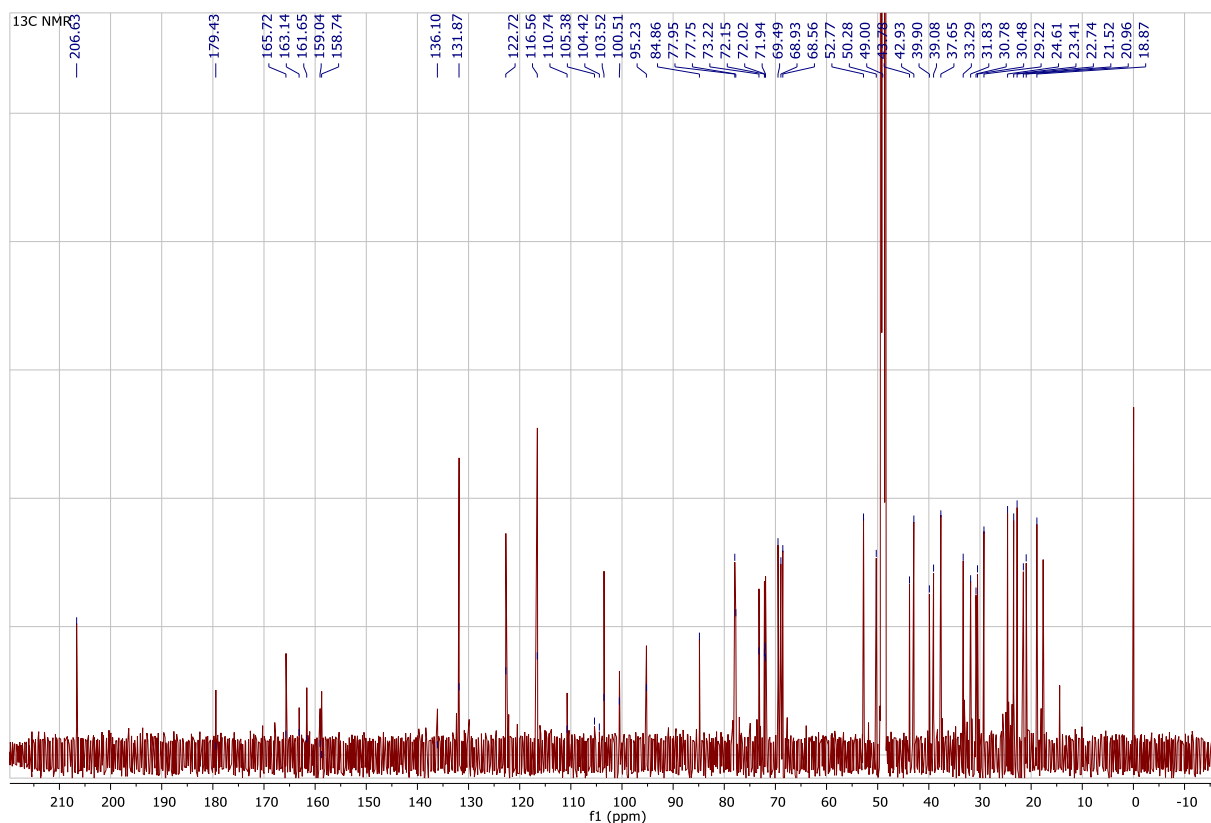

Figure S11. <sup>13</sup>C NMR spectrum (150 MHz, CD<sub>3</sub>OD) of a mixture of compounds **8** and **9**.

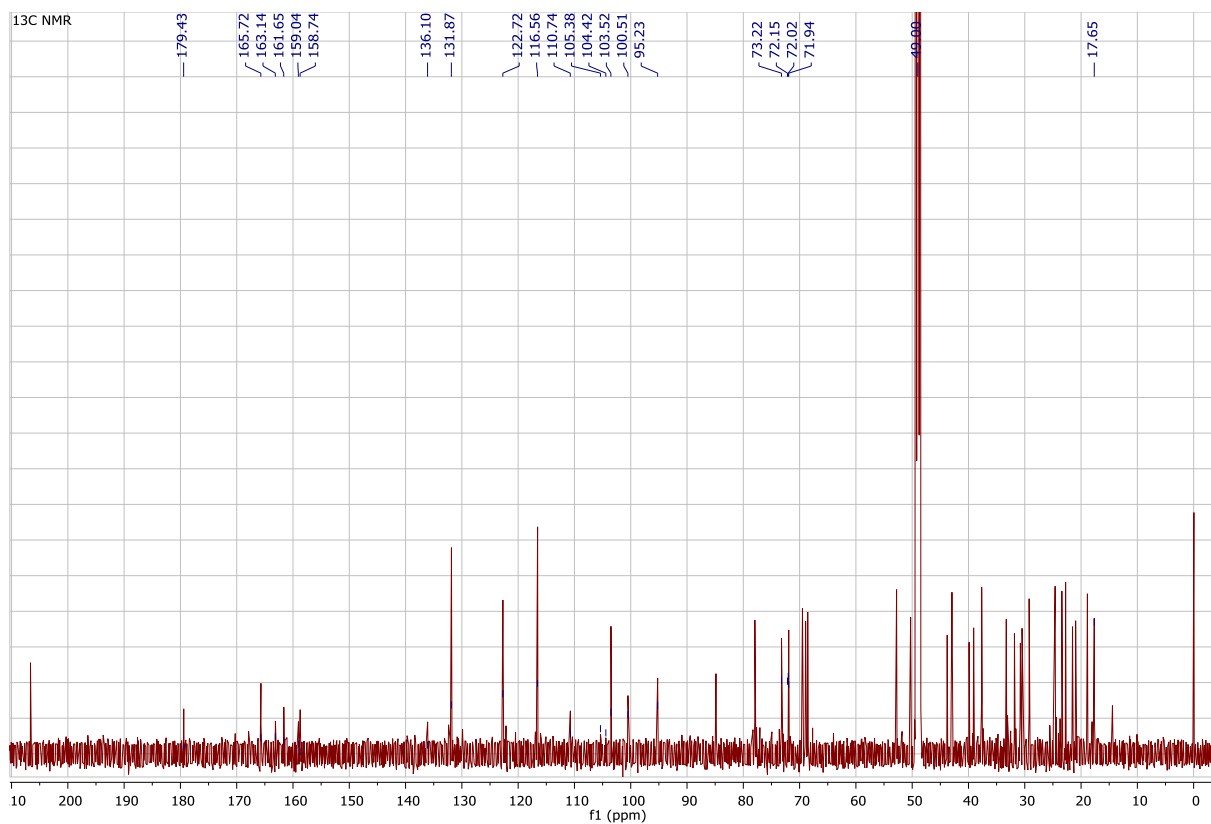

Figure S12. <sup>13</sup>C NMR spectrum (150 MHz, CD<sub>3</sub>OD) of a mixture of compounds **8** and **9**. Only signals of compound **8** are labeled.

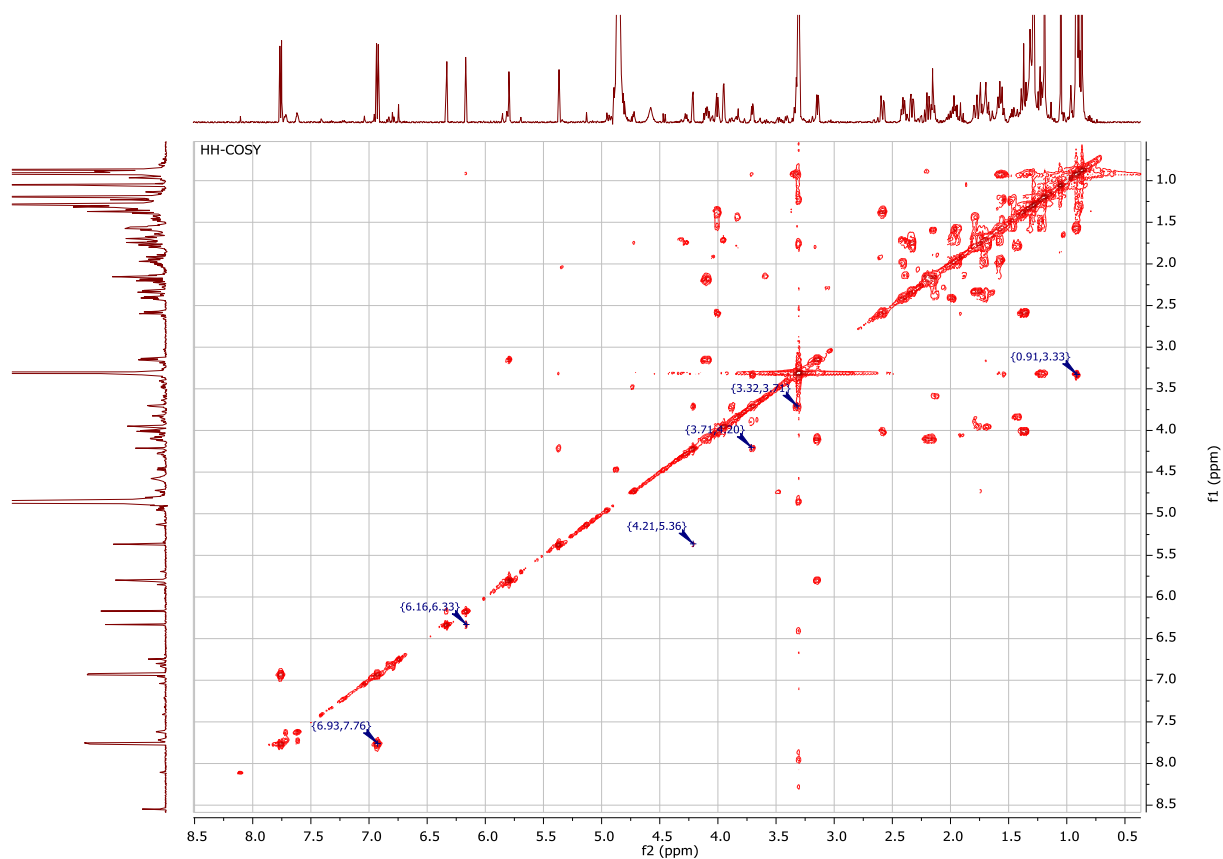

Figure S13. HH-COSY spectrum (600 MHz, CD<sub>3</sub>OD) of a mixture of compounds **8** and **9**. Only signals of compound **8** are labeled.

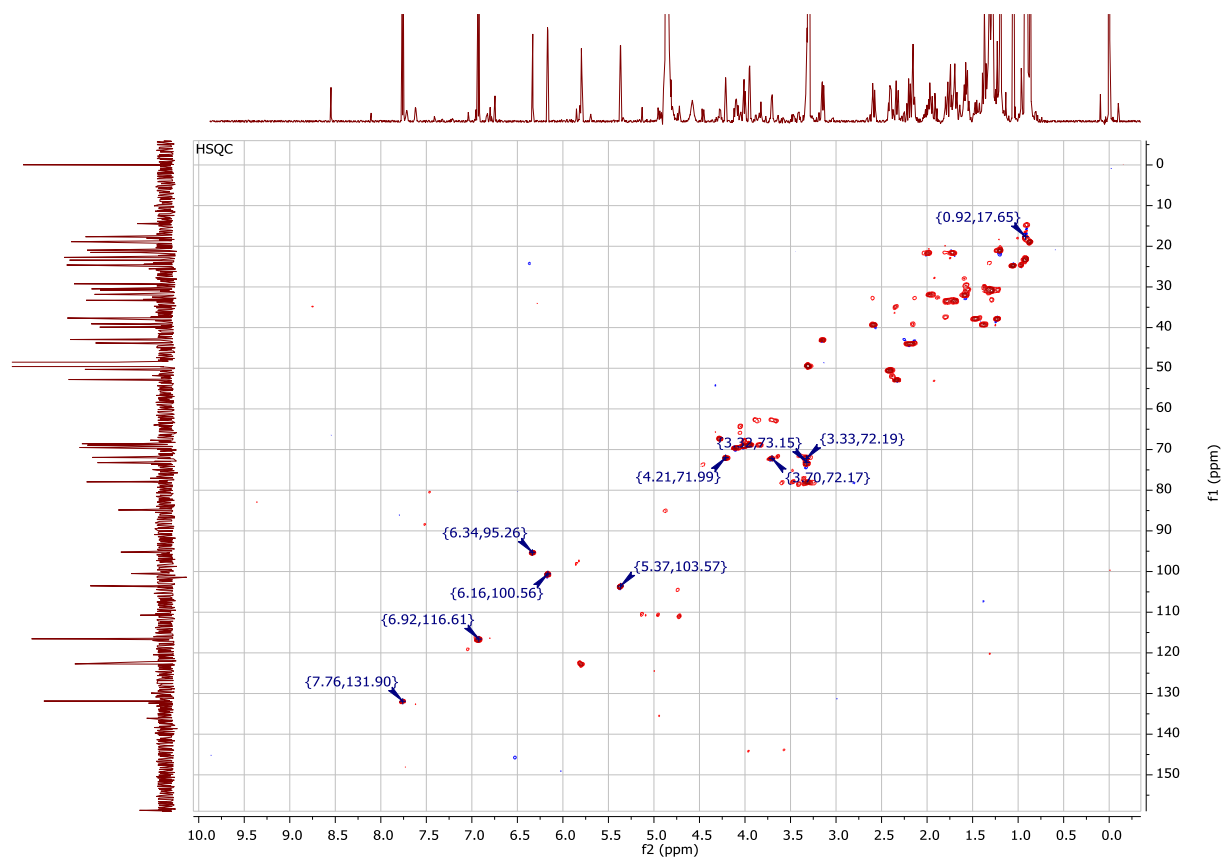

Figure S14. HSQC spectrum (600/150 MHz, CD<sub>3</sub>OD) of a mixture of compounds **8** and **9**. Only signals of compound **8** are labeled.

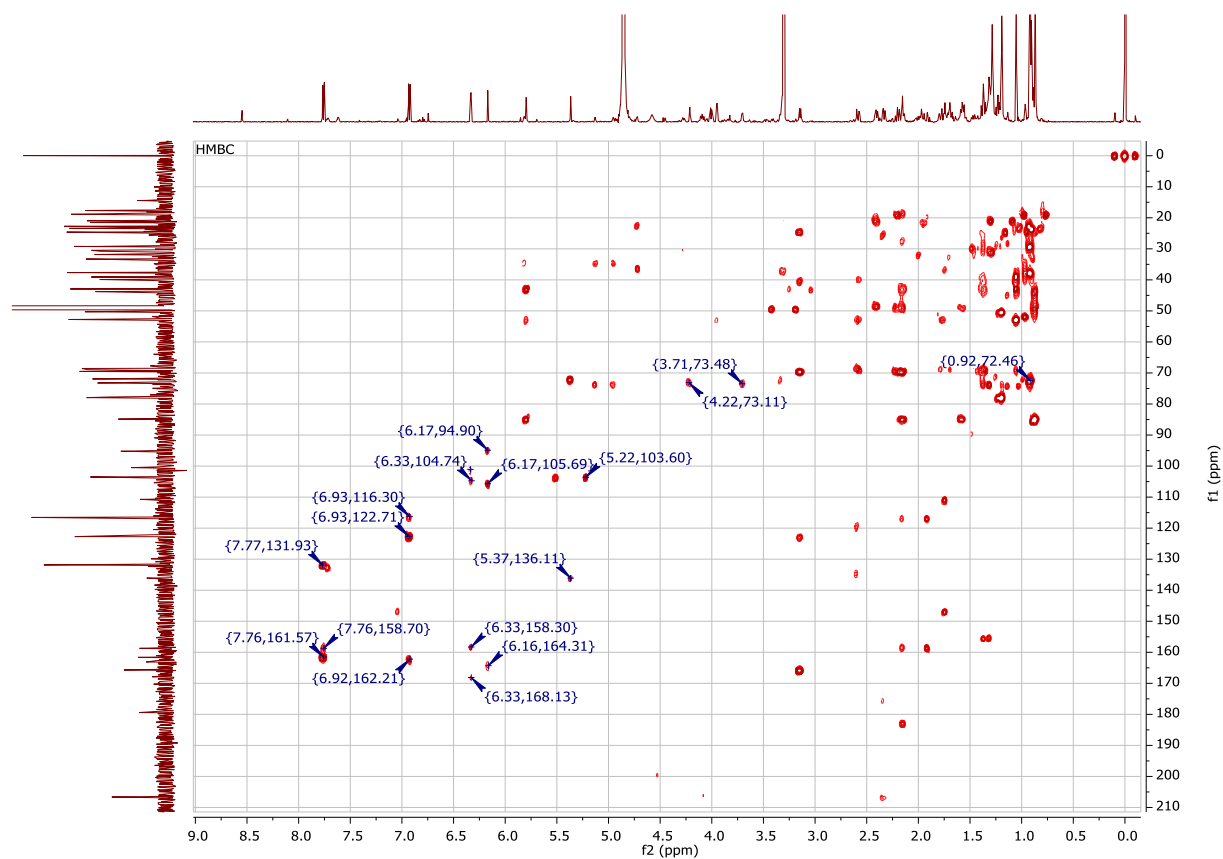

Figure S15. HMBC spectrum (600/150 MHz, CD<sub>3</sub>OD) of a mixture of compounds **8** and **9**. Only signals of compound **8** are labeled.

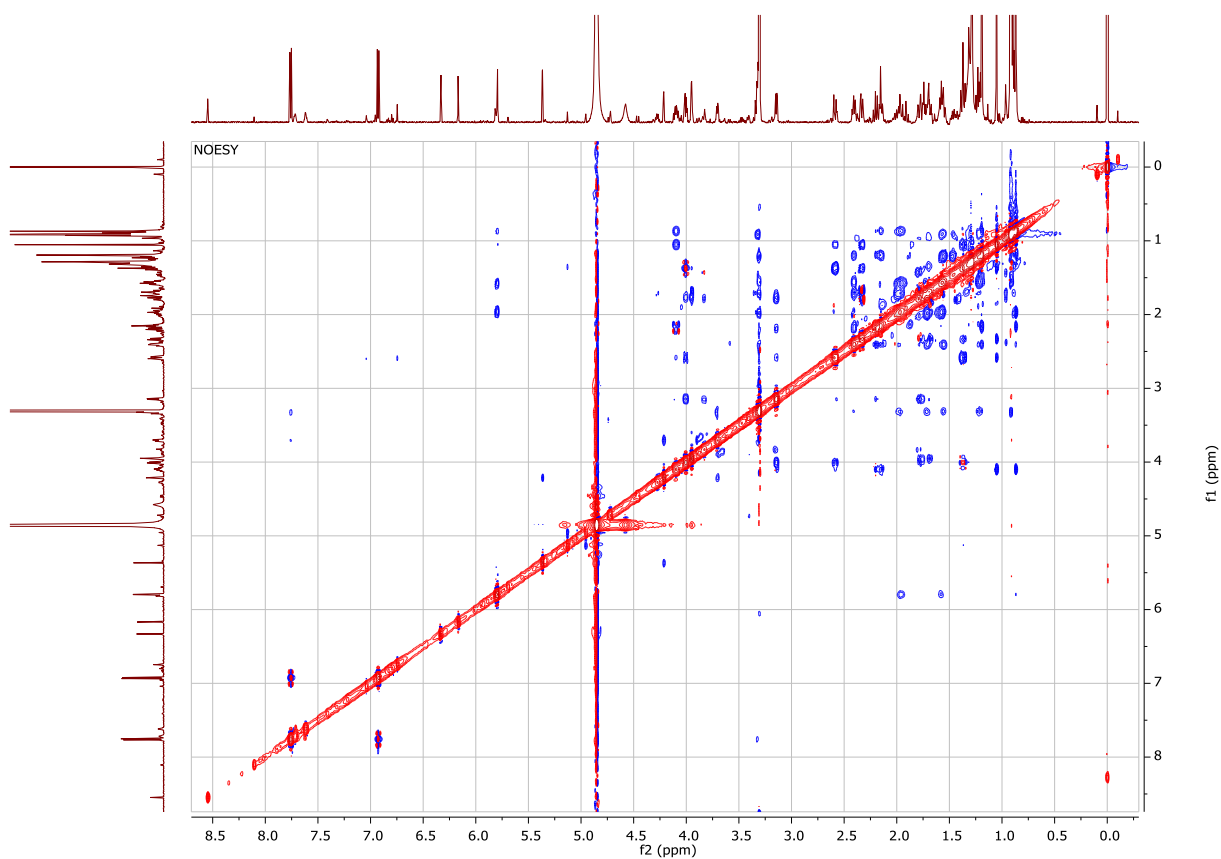

Figure S16. NOESY spectrum (600 MHz, CD<sub>3</sub>OD) of a mixture of compounds **8** and **9**.

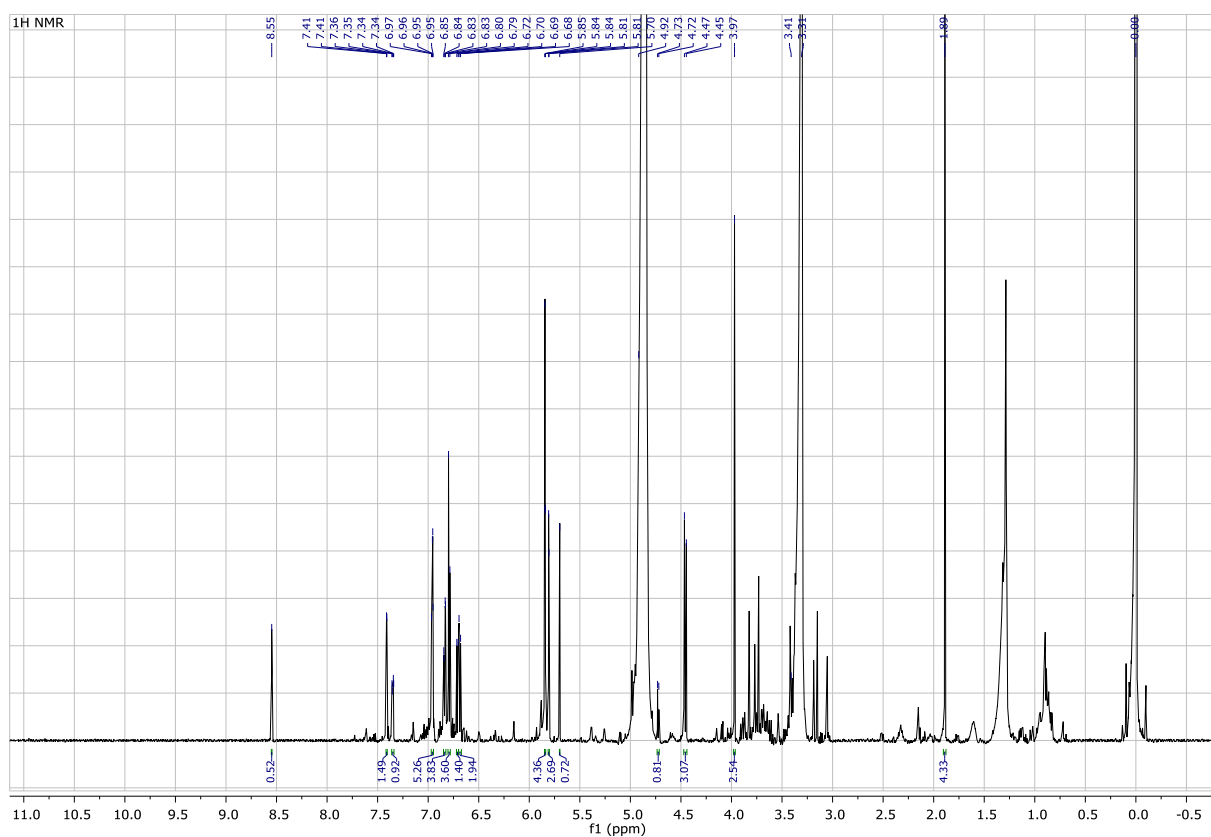

Figure S17. <sup>1</sup>H NMR spectrum (600 MHz, CD<sub>3</sub>OD) of a mixture of compounds **7**, **10** and **11**.

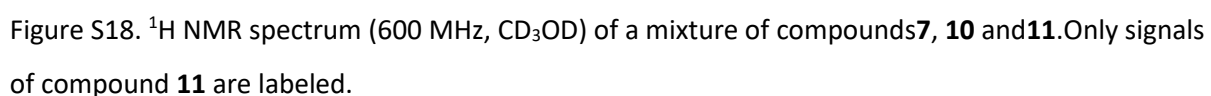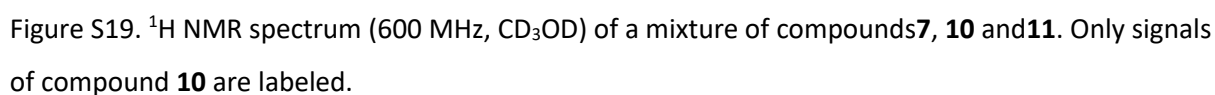

Figure S20.  $^1\text{H}$  NMR spectrum (600 MHz,  $\text{CD}_3\text{OD}$ ) of a mixture of compounds **7**, **10** and **11**. Only signals of compound **7** are labeled.

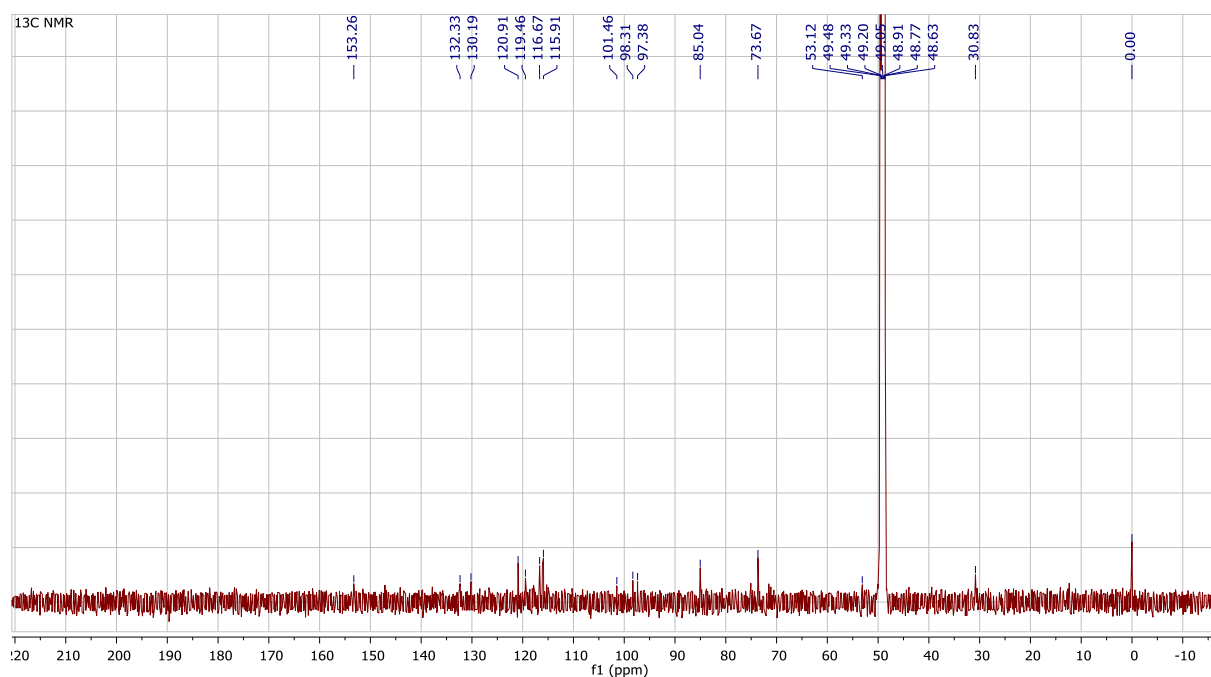

Figure S21.  $^{13}\text{C}$  NMR spectrum (150 MHz,  $\text{CD}_3\text{OD}$ ) of a mixture of compounds **7**, **10** and **11**.

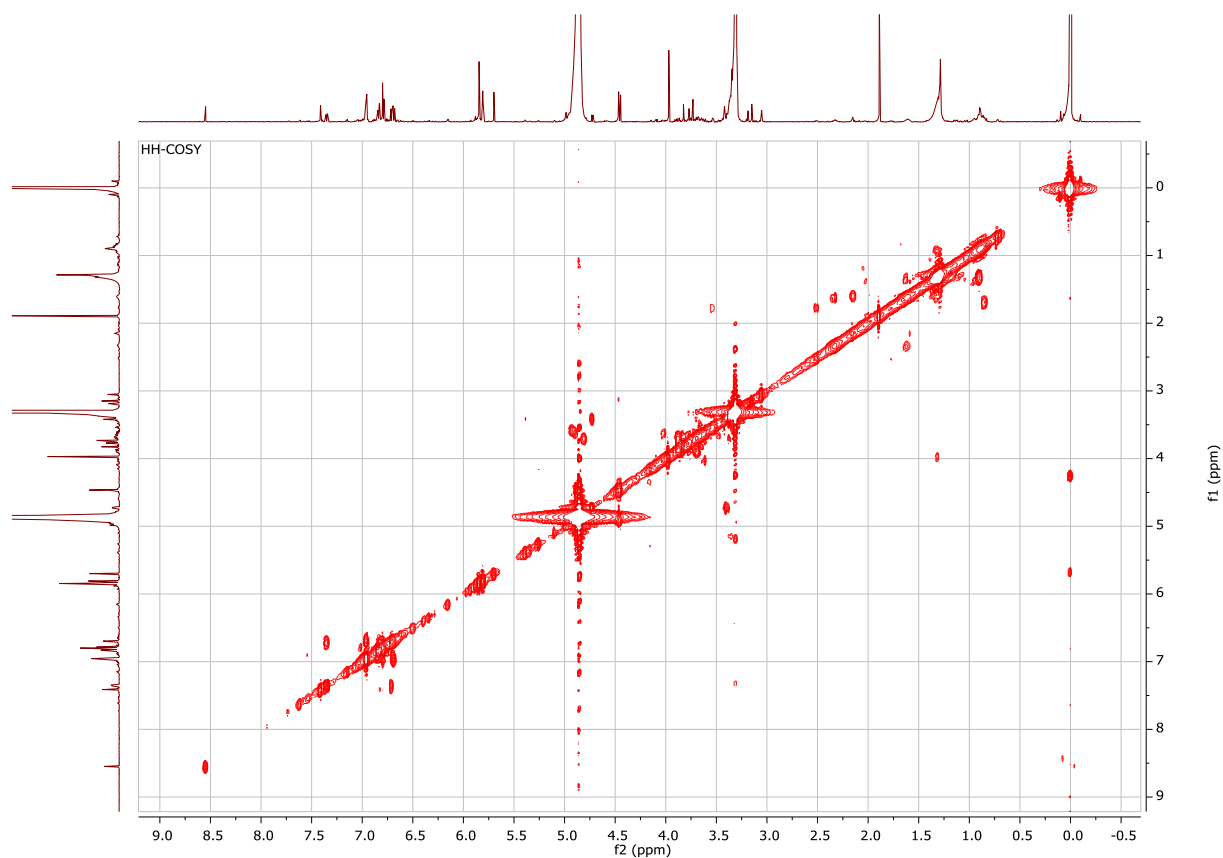

Figure S22. HH-COSY spectrum (600 MHz,  $\text{CD}_3\text{OD}$ ) of a mixture of compounds **7**, **10** and **11**.

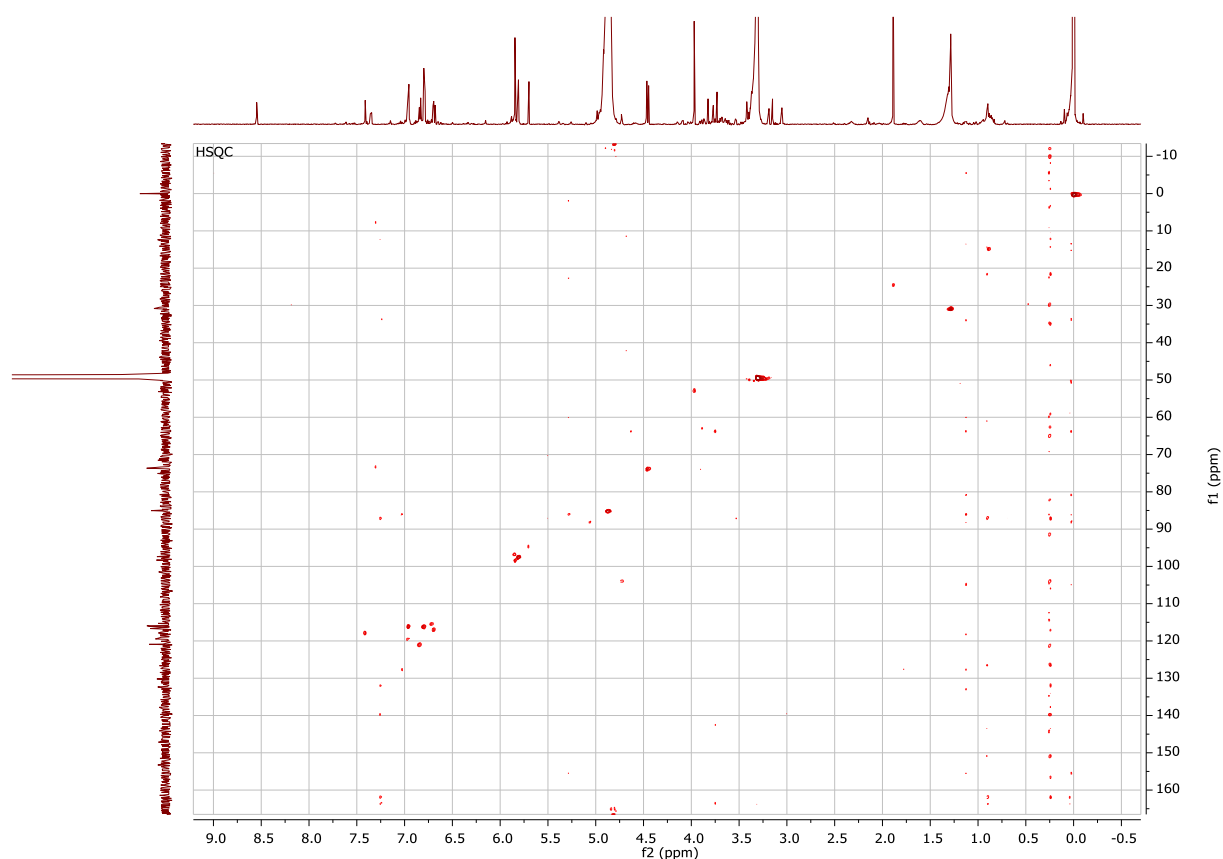

Figure S23. HSQC spectrum (600/150 MHz, CD<sub>3</sub>OD) of a mixture of compounds **7**, **10** and **11**.

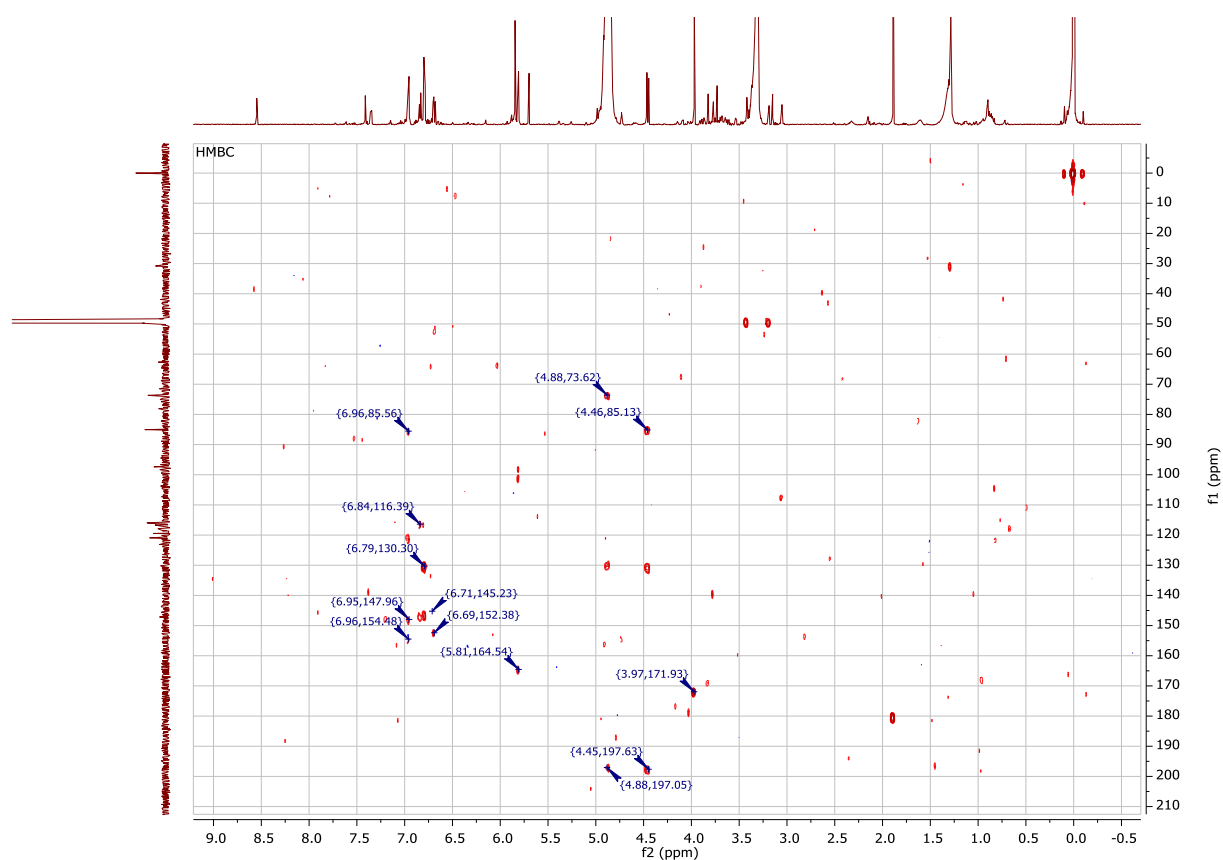

Figure S24. HMBC spectrum (600/150 MHz, CD<sub>3</sub>OD) of a mixture of compounds **7**, **10** and **11**. The signals of compound **7** are labeled.

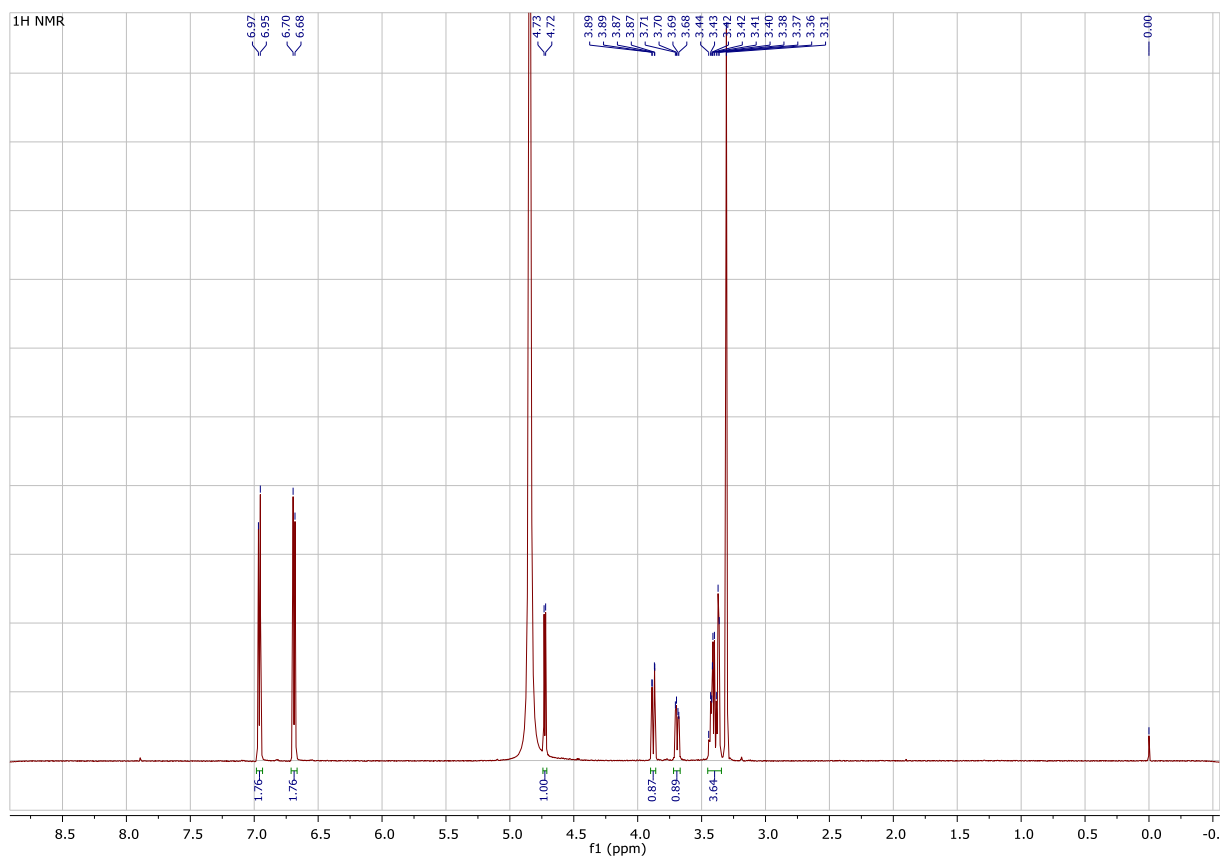

Figure S25. <sup>1</sup>H NMR spectrum (600 MHz, CD<sub>3</sub>OD) of arbutin from *Serratula quinquefolia*.

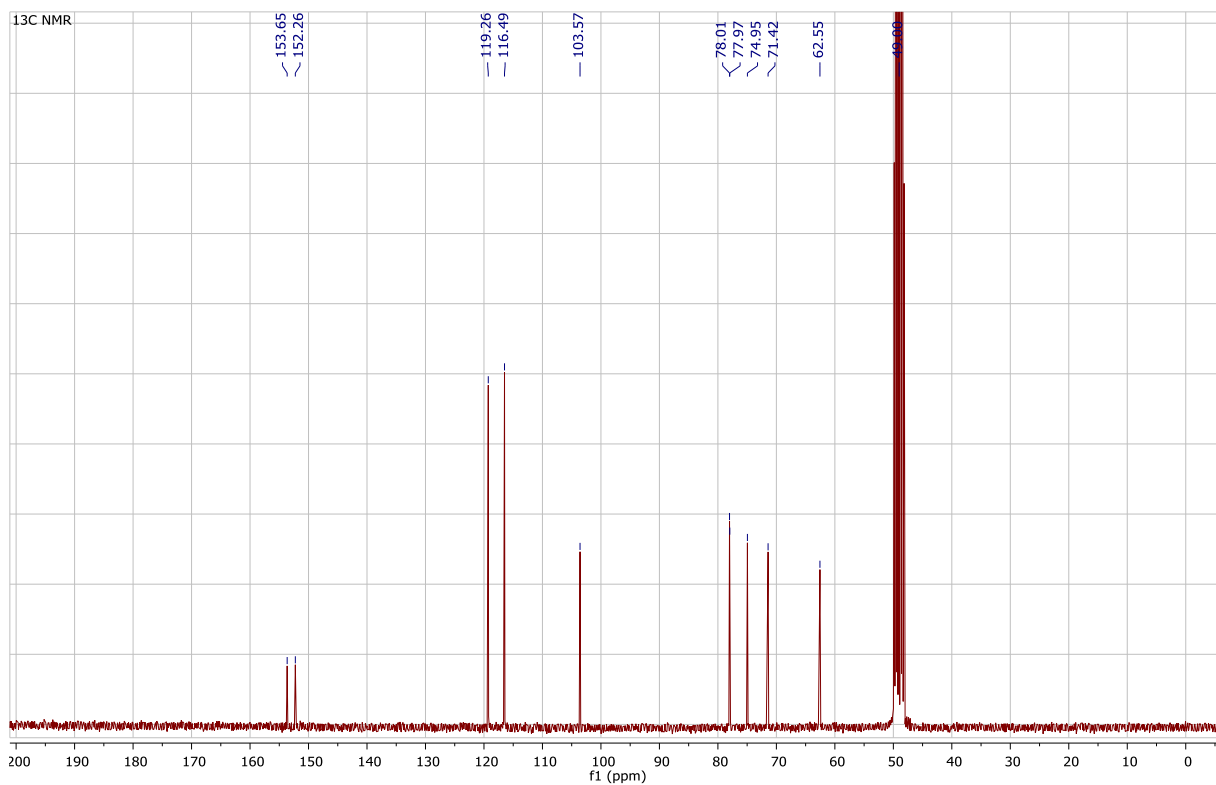

Figure S26. <sup>13</sup>C NMR spectrum (150 MHz, CD<sub>3</sub>OD) of arbutin from *Serratula quinquefolia*.

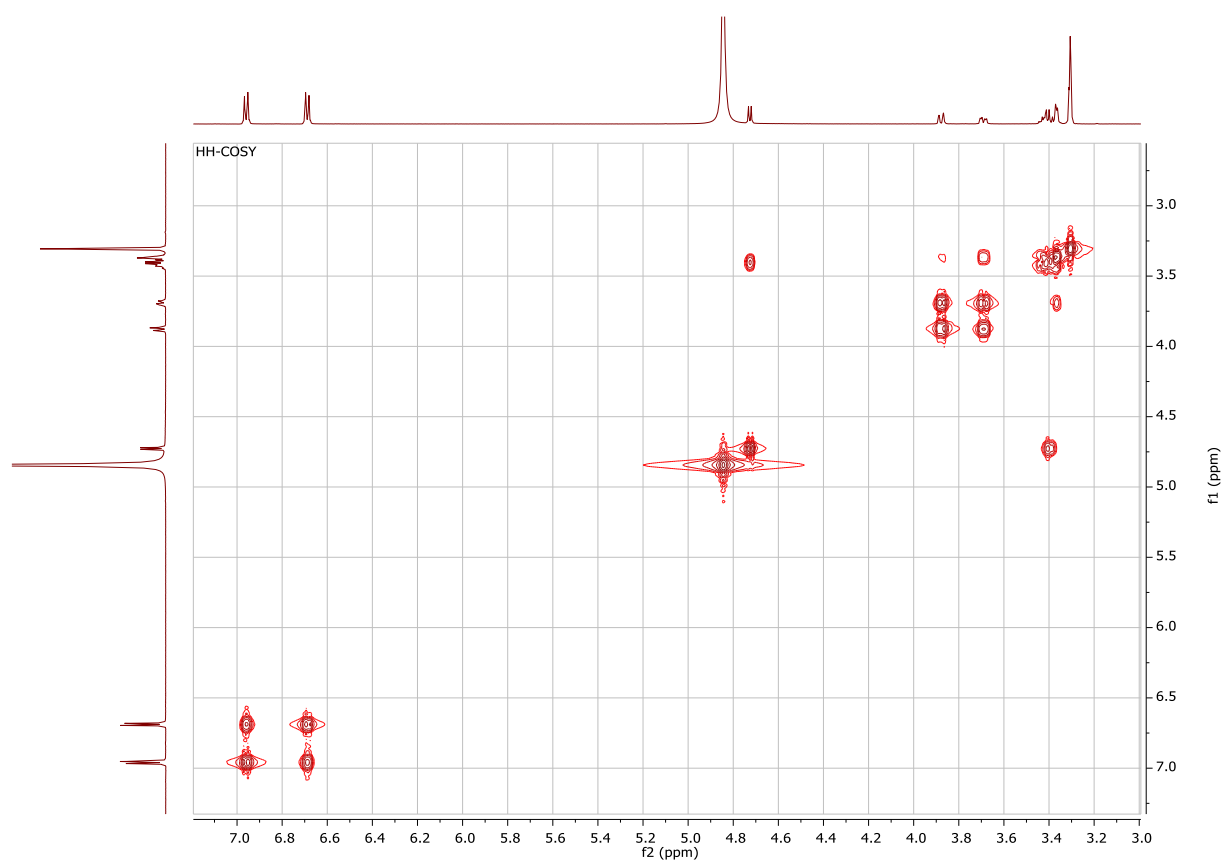

Figure S27. HH-COSY spectrum (600 MHz, CD<sub>3</sub>OD) of arbutin from *Serratula quinquefolia*.

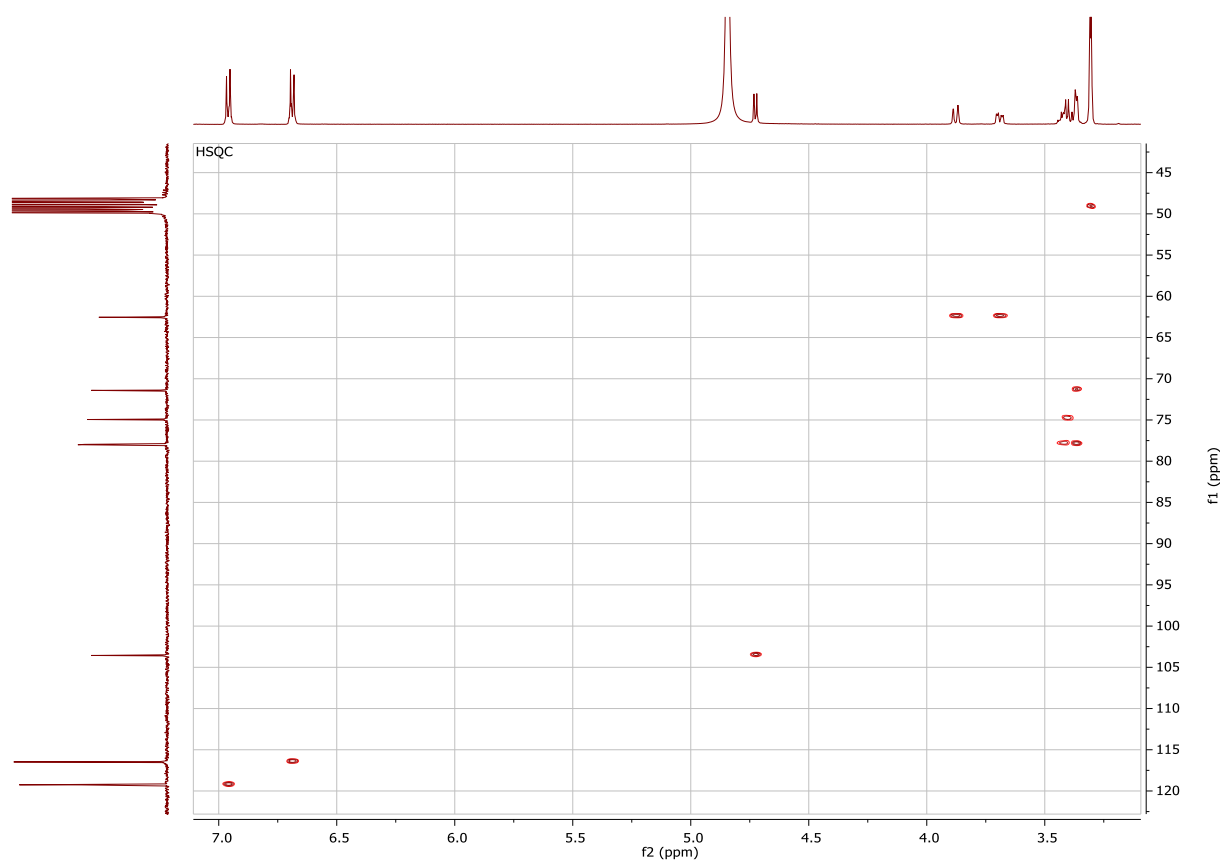

Figure S28. HSQC spectrum (600/150 MHz, CD<sub>3</sub>OD) of arbutin from *Serratula quinquefolia*.

Table S1. NMR data (CD<sub>3</sub>OD) of arbutin isolated from *Serratula quinquefolia*.

| carbon | <sup>13</sup> C<br>δ <sub>C</sub> | <sup>1</sup> H<br>δ <sub>H</sub> (Hz)    |
|--------|-----------------------------------|------------------------------------------|
| 1      |                                   | -                                        |
| 2      | 118.00                            | 6.96 d (8.9)                             |
| 3      | 115.20                            | 6.69 d (8.9)                             |
| 4      |                                   | -                                        |
| 5      | 115.20                            | 6.69 d (8.9)                             |
| 6      | 118.00                            | 6.96 d (8.9)                             |
| 1'     | 102.26                            | 4.73 d (7.3)                             |
| 2'     | 73.57                             | 3.40 dd (9.0, 7.3)                       |
| 3'     | 76.63                             | 3.43 t (9.0)                             |
| 4'     | 70.09                             | 3.53 m                                   |
| 5'     | 76.63                             | 3.53 m                                   |
| 6'     | 61.18                             | 3.88 dd (12.0, 1.3), 3.69 dd (12.0, 5.4) |
